# Supplementary material for: Design, synthesis, characterization and application of a novel electron-deficient moiety 1,5-diazacarbazole in high triplet energy host materials
Source: Royal Society of Chemistry journal article supplement (doi:10.1039/c6tc01266c), 2016-01-01
Supplement: c6tc01266c1.pdf [file c6tc01266c1.pdf]

## Supporting Information

### The Design, Synthesis, Characterization and Application of Novel Electron-deficient Moiety 1, 5-Diazacarbazole in High Triplet Energy Host Materials

Jianghong Tan, Bo Wang, Zhi Huang, Xialei Lv, Wei Yi, Shaoqing Zhuang, Lei Wang,\*

Wuhan National Laboratory for Optoelectronics, Huazhong University of Science and Technology,  
Wuhan 430074, People's Republic of China

\*E-mail: [wanglei@mail.hust.edu.cn](mailto:wanglei@mail.hust.edu.cn)

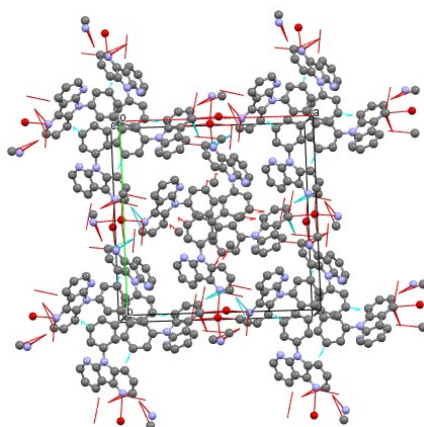

Figure S1. Packing structure of NCzBPhNCz·0.5H<sub>2</sub>O

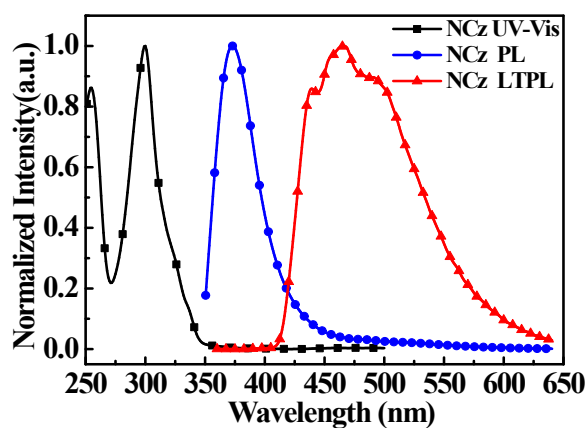

Figure S2. Photophysical properties of NCz

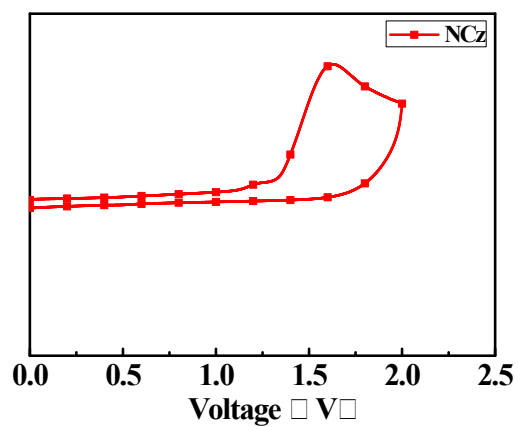

Figure S3. Cyclic voltammetry curve of NCz

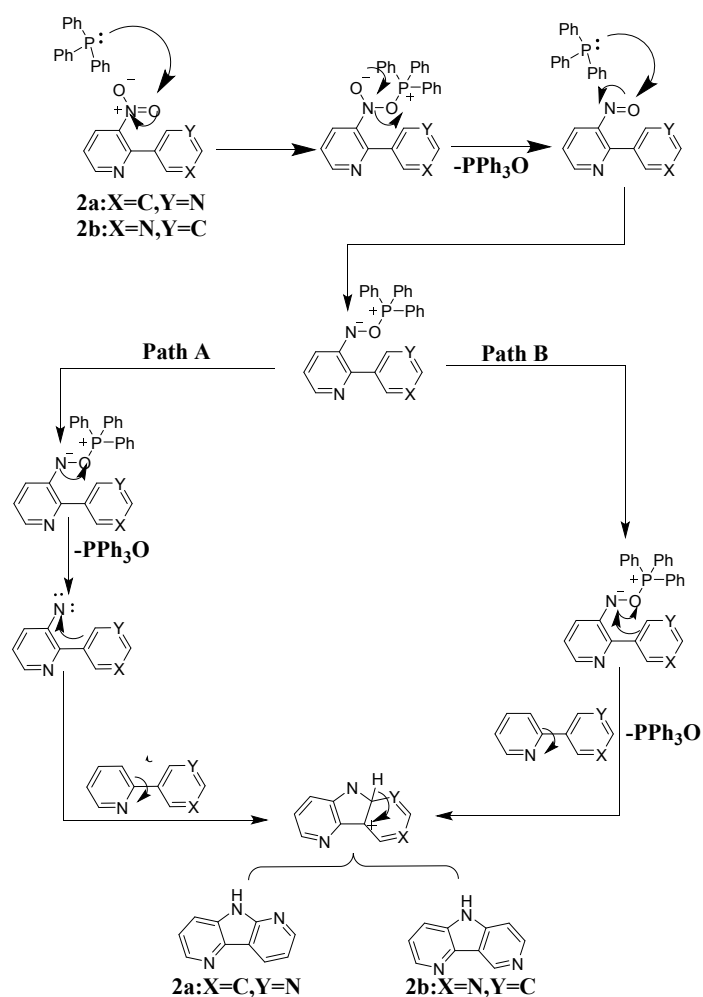

Figure S4 The possible reaction mechanism for reductive cyclization<sup>1-3</sup>

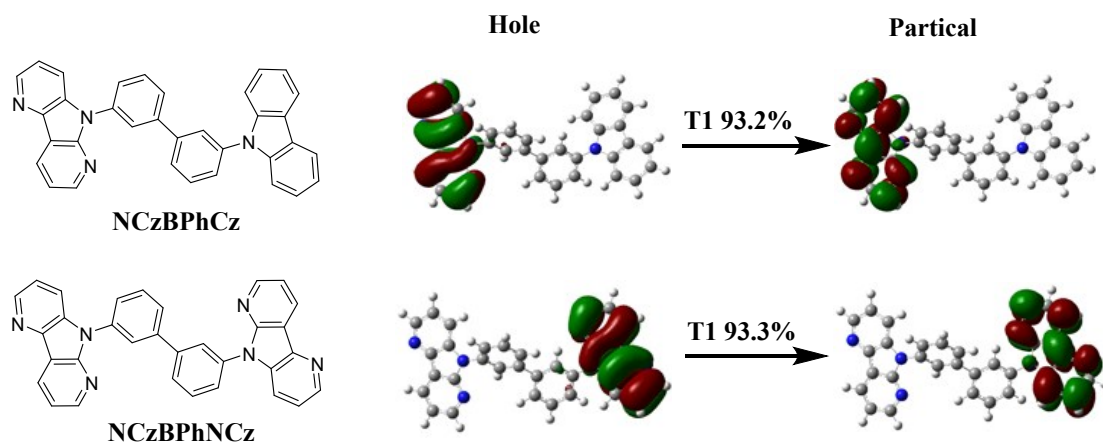

**Figure S5.** The  $S_0 \rightarrow T_1$  NTO of NCzBPhCz and NCzBPhNCz and the weights of hole-particle are given for the  $S_0 \rightarrow T_1$  excitations.

**Table S1.** Crystal Data and Structure Refinement for **NCzBPhNCz·0.5H<sub>2</sub>O**

|                                                     |                                                                 |
|-----------------------------------------------------|-----------------------------------------------------------------|
| formula                                             | C <sub>32</sub> H <sub>21</sub> N <sub>6</sub> O <sub>0.5</sub> |
| fw                                                  | 497.55                                                          |
| cryst size, mm                                      | 0.21 × 0.16 × 0.14                                              |
| <i>T</i> , K                                        | 153(2)                                                          |
| cryst syst                                          | tetragonal                                                      |
| space group                                         | I-4                                                             |
| <i>a</i> , Å                                        | 18.5174(19)                                                     |
| <i>b</i> , Å                                        | 18.5174(19)                                                     |
| <i>c</i> , Å                                        | 7.2125(15)                                                      |
| <i>α</i> , deg                                      | 90.00                                                           |
| <i>β</i> , deg                                      | 90.00                                                           |
| <i>γ</i> , deg                                      | 90.00                                                           |
| <i>V</i> , Å <sup>3</sup>                           | 2473.1(7)                                                       |
| <i>Z</i>                                            | 4                                                               |
| <i>ρ</i> , g cm <sup>-3</sup>                       | 1.336                                                           |
| <i>μ</i> , mm <sup>-1</sup>                         | 0.083                                                           |
| <i>F</i> (000)                                      | 1036                                                            |
| data/restraints/parameters                          | 3062/0/174                                                      |
| quality-of-fit indicator                            | 1.020                                                           |
| final <i>R</i> indices [ <i>I</i> > 2σ( <i>I</i> )] | <i>R</i> <sub>1</sub> = 0.0542, <i>wR</i> <sub>2</sub> = 0.1309 |
| <i>R</i> indices (all data)                         | <i>R</i> <sub>1</sub> = 0.0772, <i>wR</i> <sub>2</sub> = 0.1420 |

**Table S2.** Calculation energy level of Cz, Cb, NCz and hosts

|           | HOMO  | LUMO  | bandgap | Triplet energy |
|-----------|-------|-------|---------|----------------|
| Cz        | -5.44 | -0.64 | 4.8     | 3.19           |
| Cb        | -5.77 | -1.02 | 4.75    | 3.14           |
| NCz       | -6.10 | -1.33 | 4.77    | 3.19           |
| NCzBPhCz  | -5.41 | -1.37 | 4.04    | 3.18           |
| NCzBPhNCz | -5.83 | -1.43 | 4.4     | 3.18           |

## References

- 1 A. W. Freeman, M. Urvoy and M. E. Criswell, *J. Org. Chem.*, 2005, **70**, 5014-5019.
- 2 Bouchard J, Wakim S and Leclerc M, *J. Org. Chem*, 2004, **69**, 5705-5711.
- 3 G. Zotti, G. Schiavon, S. Zecchin, J. F. Morin and L. Mario, *Macromolecules*. 2002, **35**, 2122-2128.
